# Supplementary material for: Genetics of Smoking and Risk of Atherosclerotic Cardiovascular Diseases: A Mendelian Randomization Study
Source: PubMed Central journal article supplement (PMC7816104; doi:10.1001/jamanetworkopen.2020.34461), 2021-01-19
Supplement: jamanetwopen-e2034461-s001.pdf [file jamanetwopen-e2034461-s001.pdf]

## Supplementary Online Content

Levin MG, Klarin D, Assimes TL, et al; VA Million Veteran Program. Genetics of smoking and risk of atherosclerotic cardiovascular diseases: a mendelian randomization study. *JAMA Network Open*. 2021;4(1):e2034461. doi:10.1001/jamanetworkopen.2020.34461

**eFigure 1.** MR of Lifetime Smoking Index to GSCAN Smoking Traits

**eFigure 2.** Primary Smoking-ASCVD MR Funnel Plots

**eFigure 3.** Primary Smoking-ASCVD MR Leave-One-Out Analysis

**eFigure 4.** Primary Smoking-ASCVD MR Single-SNP Analysis

**eFigure 5.** Primary Smoking-ASCVD MR Single-SNP Analysis

**eFigure 6.** MR of Smoking Initiation to ASCVD Outcomes

**eFigure 7.** MR of Smoking Initiation to Cardiometabolic Risk Factors

**eTable 1.** Smoking Index exposure SNPs and Corresponding SNP Effects for CAD, PAD, and Stroke Outcomes

**eTable 2.** Egger Bias Intercept Test for Smoking Index-ASCVD Analysis

**eTable 3.** MR Steiger Directionality Test for Smoking-Cardiometabolic Risk Factor Analysis

This supplementary material has been provided by the authors to give readers additional information about their work.

**eFigure 1. MR of Lifetime Smoking Index to GSCAN Smoking Traits**

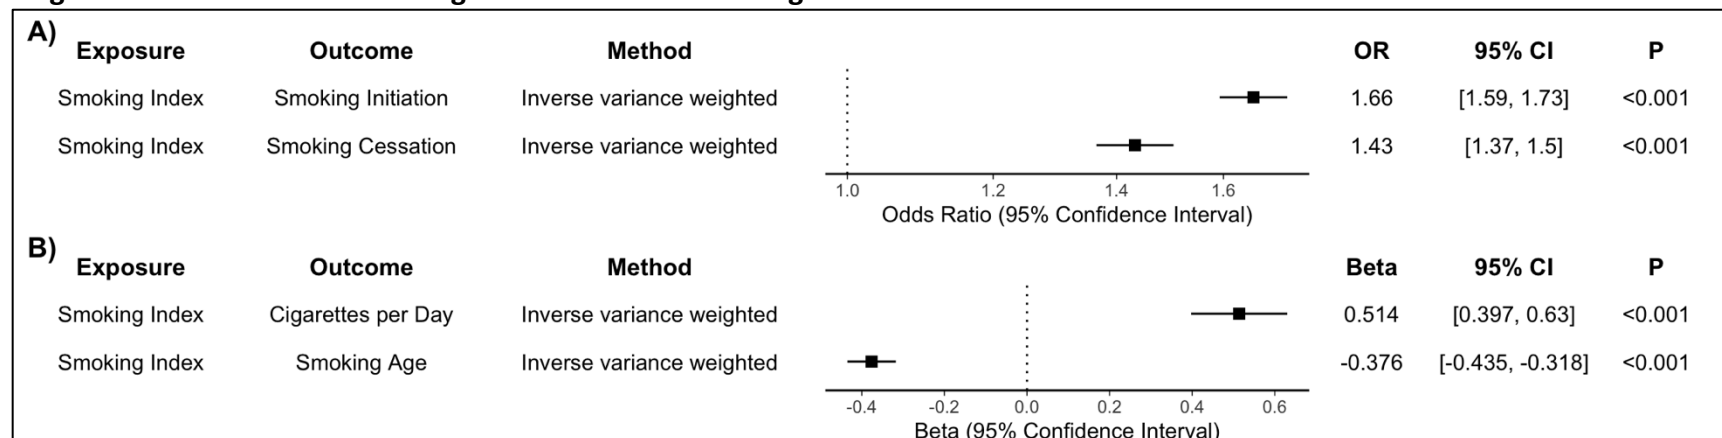

The lifetime smoking instrument was validated against smoking exposures from the GSCAN consortium. A) Odds ratios for the effect of each one standard deviation increase in lifetime smoking on Smoking Initiation and Smoking Cessation. B) Beta coefficients for the effect of each one standard deviation increase in lifetime smoking on Cigarettes per Day and Smoking Age (age of initiation). OR = Odds Ratio, CI = Confidence Interval.

**eFigure 2. Primary Smoking-ASCVD MR Funnel Plots**

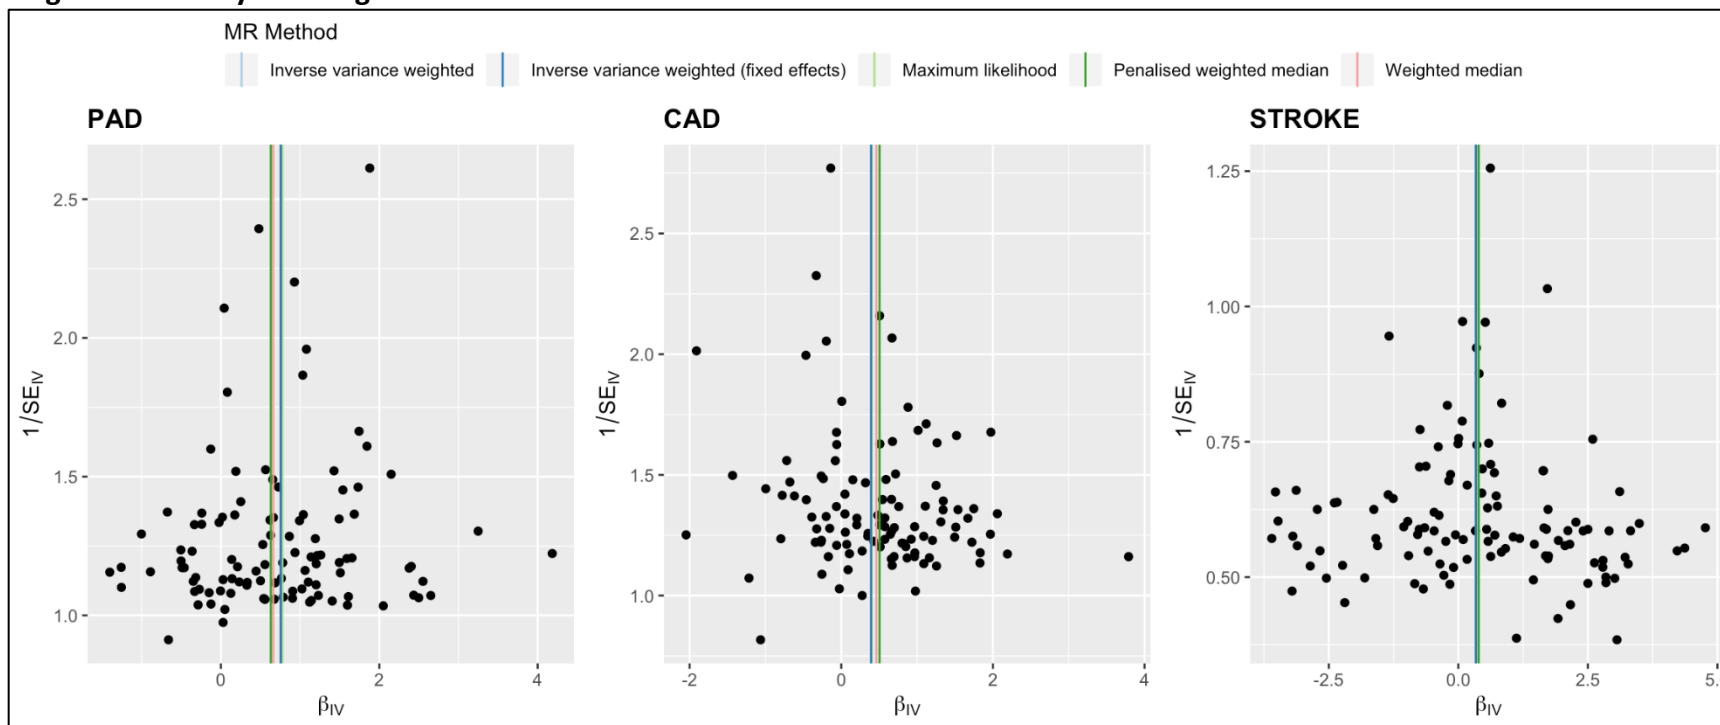

Funnel plots showing the relationship between the SNP-level causal effects of lifetime smoking index on each ASCVD outcome (PAD, CAD, and large artery stroke) against the inverse of the standard error of the causal estimate. Vertical lines represent the MR estimates using all SNPs for each of five different MR methods. Asymmetry in funnel plots may be an indicator of heterogeneous effects that may be related to directional horizontal pleiotropy or “winner’s curse” that lead to bias in effect estimates.

eFigure 3. Primary Smoking-ASCVD MR Leave-One-Out Analysis

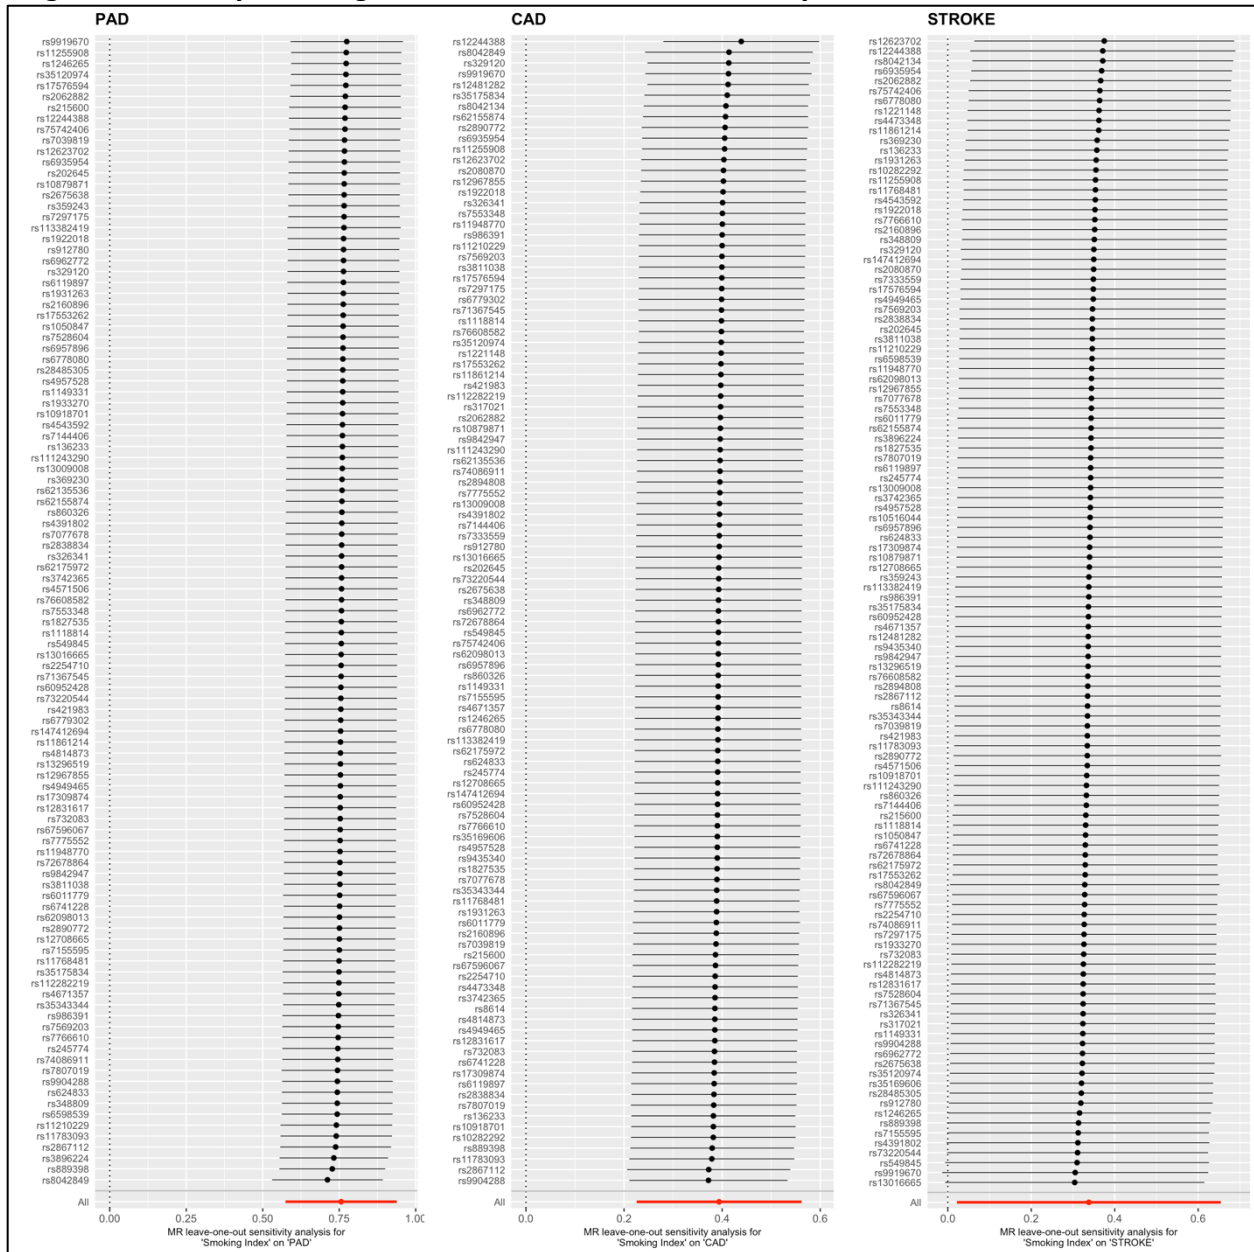

In leave-one-out analysis, each individual SNP is sequentially excluded from the inverse variance weighted MR model to identify outlier SNPs that may drive outside effects. Plotted are the log odds ratios of each leave-one-out model for each ASCVD outcome (CAD, PAD, and large artery stroke) against the SNP excluded from each model. Lines extending from each point represent the 95% confidence intervals of the effect estimate.

eFigure 4. Primary Smoking-ASCVD MR Single-SNP Analysis

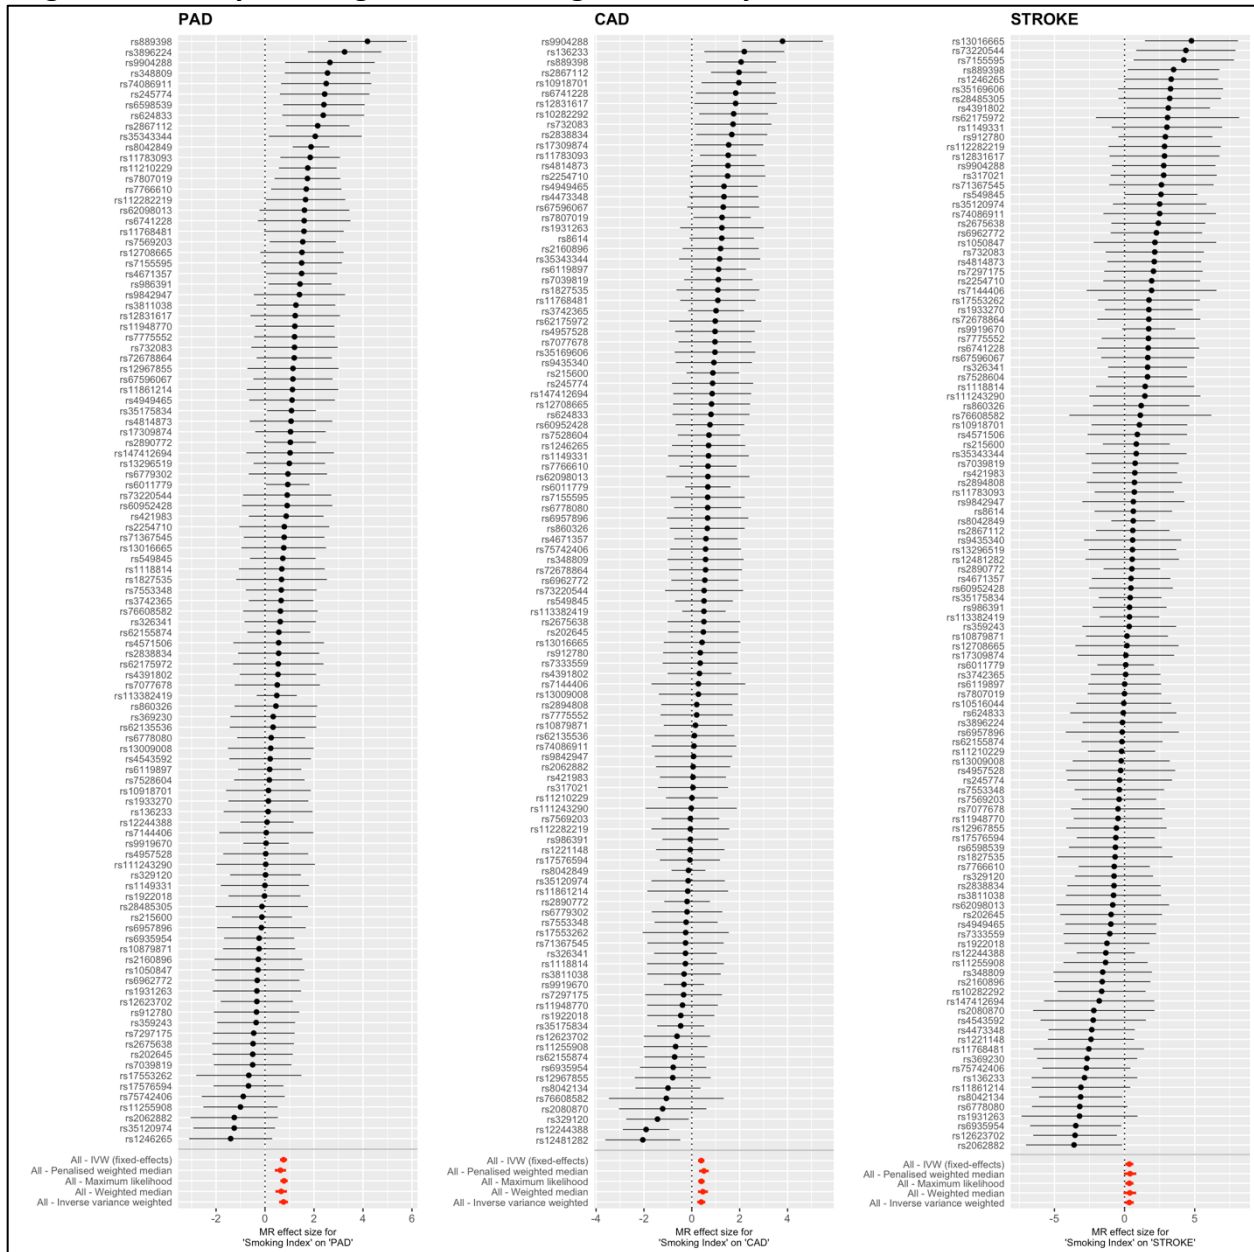

The single-SNP MR method plots the Wald estimate of the effect of each SNP included in the lifetime smoking genetic instrument on each ASCVD outcome. Lines extending from each point represent the 95% confidence interval of the odds ratio (points). Red estimates at the bottom of each plot represent the summary measures from five MR models including all of the individual SNPs.

**eFigure 5. Primary Smoking-ASCVD MR Single-SNP Analysis**

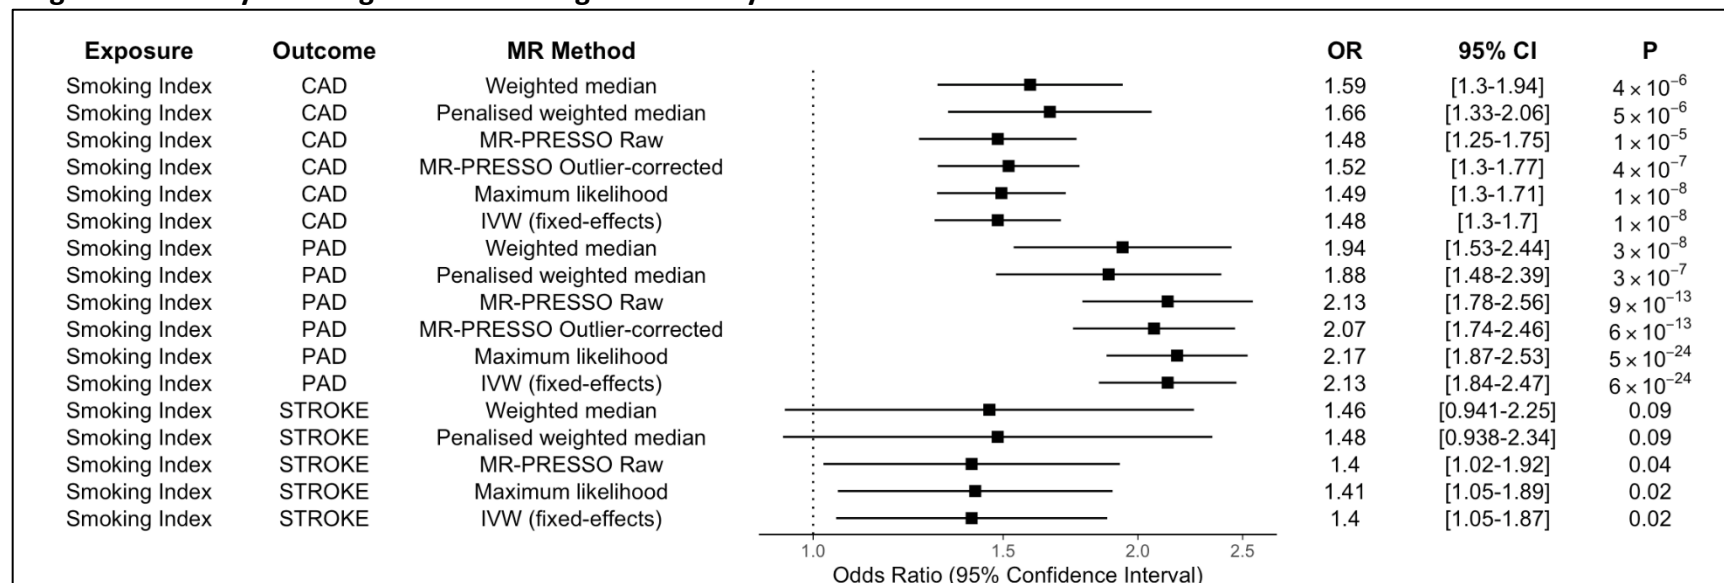

The effect of each one standard deviation increase in lifetime smoking index on each ASCVD outcome (CAD, PAD, and large artery stroke) was estimated using multiple MR methods that make different assumptions about the potential violations of the instrumental variable assumptions, heterogeneity, and error in the instrument-exposure associations. The effect of smoking on each outcome was consistent across MR models.

**eFigure 6. MR of Smoking Initiation to ASCVD Outcomes**

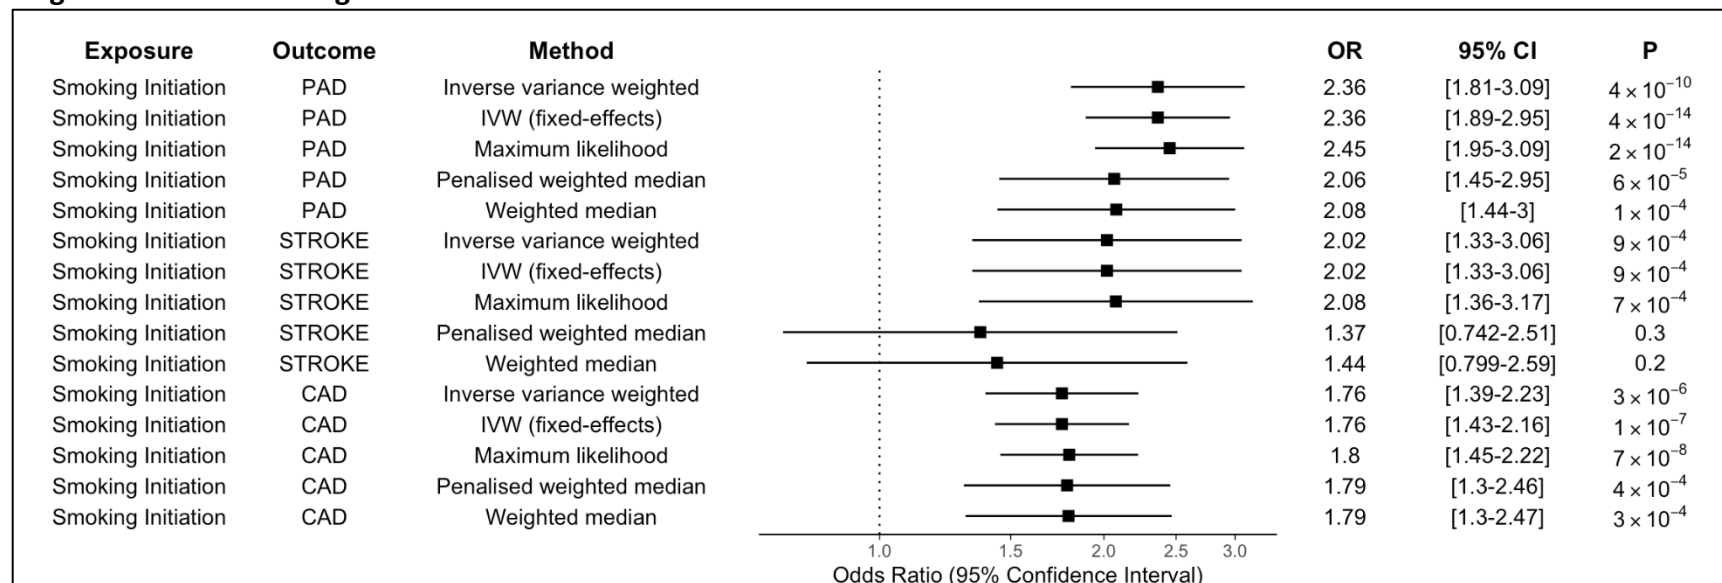

The robustness of the effect of lifetime smoking on ASCVD outcomes was assessed using an additional genetic instrument for smoking (Smoking Initiation). The effect of each one standard deviation increase in smoking initiation on each ASCVD outcome (CAD, PAD, and large artery stroke) was estimated using multiple MR methods that make different assumptions about the potential violations of the instrumental variable assumptions, heterogeneity, and error in the instrument-exposure associations.

**eFigure 7. MR of Smoking Initiation to Cardiometabolic Risk Factors**

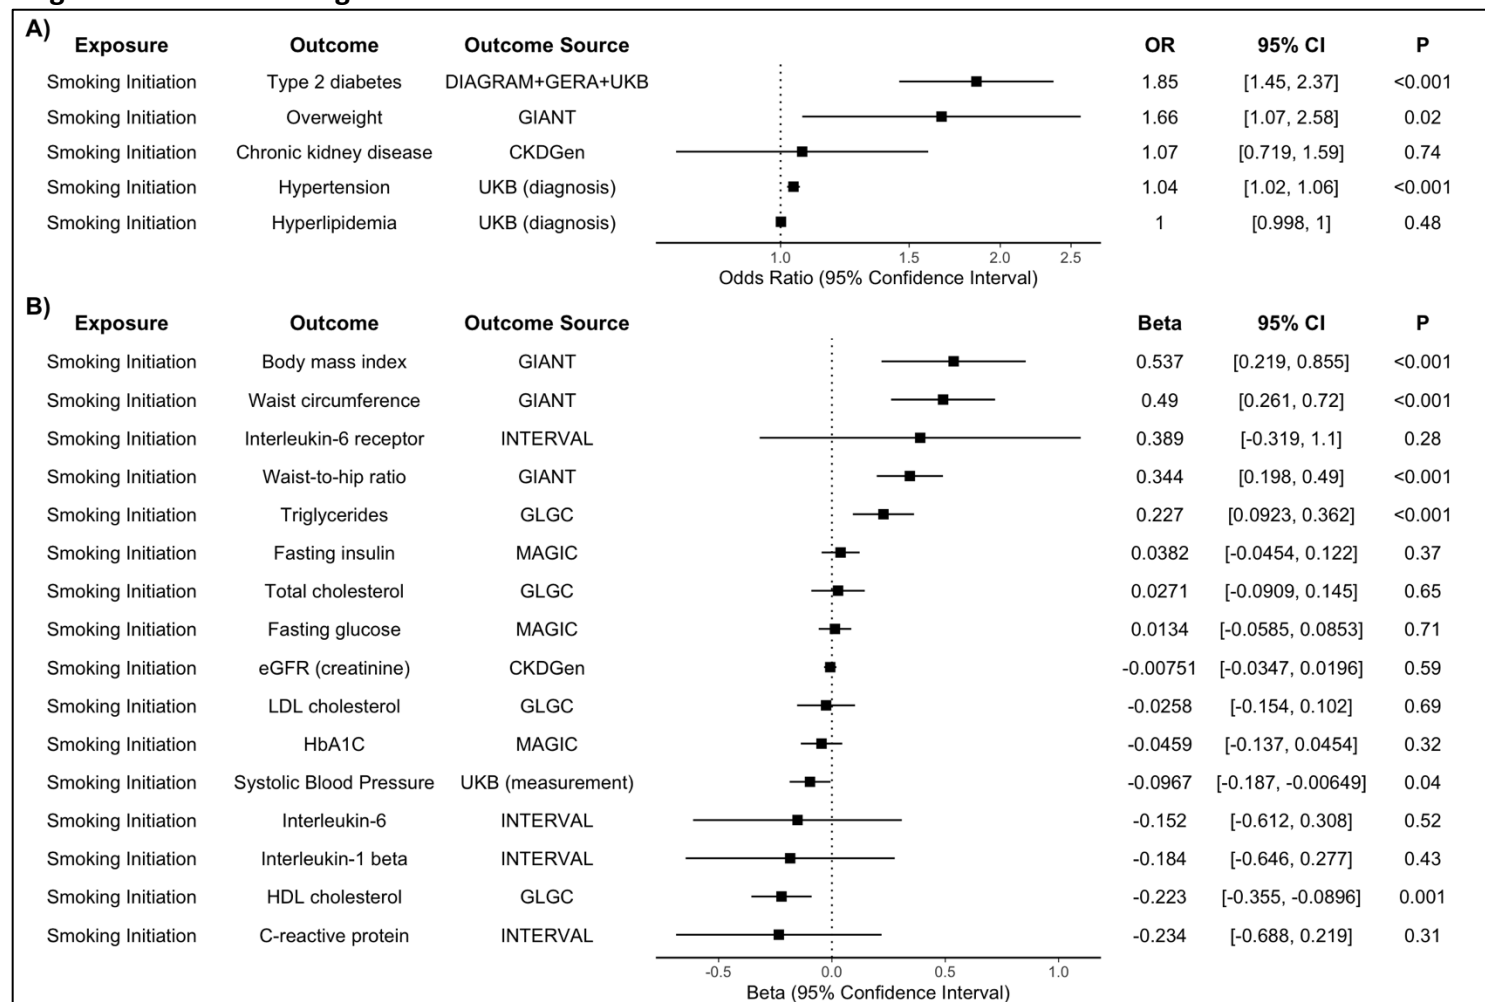

The robustness of the effect of lifetime smoking on cardiometabolic outcomes was assessed using an additional genetic instrument for smoking (Smoking Initiation). The effect of each one standard deviation increase in smoking initiation on each cardiometabolic outcome (CAD, PAD, and large artery stroke) was estimated using inverse variance weighted MR. Genetic liability to smoking increased risk of both **(A)** binary traits, and **(B)** continuous traits that are common risk factors for cardiometabolic disease. OR = Odds Ratio, CI = Confidence Interval.



**eTable 1. Smoking Index exposure SNPs and Corresponding SNP Effects for CAD, PAD, and Stroke Outcomes**

| Exposure      | Outcome | SNP         | Effect allele | Alternate allele | EAF exposure | Beta exposure | SE exposure | P exposure | Beta outcome | SE outcome | P outcome |
|---------------|---------|-------------|---------------|------------------|--------------|---------------|-------------|------------|--------------|------------|-----------|
| Smoking Index | PAD     | rs1050847   | C             | T                | 0.426        | 0.011         | 0.002       | 1.80E-08   | -0.003166    | 0.0106     | 0.7651    |
| Smoking Index | PAD     | rs10879871  | T             | G                | 0.343        | -0.014        | 0.002       | 5.60E-11   | 0.003389     | 0.01054    | 0.7479    |
| Smoking Index | PAD     | rs10918701  | G             | A                | 0.372        | 0.012         | 0.002       | 2.00E-08   | 0.00169      | 0.0106     | 0.8734    |
| Smoking Index | PAD     | rs111243290 | T             | C                | 0.963        | -0.029        | 0.005       | 4.30E-08   | -0.00081     | 0.02976    | 0.9783    |
| Smoking Index | PAD     | rs1118814   | G             | A                | 0.324        | 0.012         | 0.002       | 1.40E-08   | 0.008215     | 0.01074    | 0.4446    |
| Smoking Index | PAD     | rs11210229  | A             | G                | 0.384        | 0.017         | 0.002       | 2.80E-16   | 0.02966      | 0.01022    | 0.003727  |
| Smoking Index | PAD     | rs112282219 | G             | A                | 0.959        | -0.033        | 0.005       | 3.70E-11   | -0.05464     | 0.02734    | 0.04676   |
| Smoking Index | PAD     | rs11255908  | T             | G                | 0.743        | -0.015        | 0.002       | 1.90E-10   | 0.01505      | 0.0116     | 0.194     |
| Smoking Index | PAD     | rs113382419 | C             | A                | 0.889        | -0.041        | 0.003       | 9.70E-38   | -0.01966     | 0.01713    | 0.2519    |
| Smoking Index | PAD     | rs1149331   | G             | A                | 0.477        | -0.011        | 0.002       | 3.20E-08   | 0.00005096   | 0.01011    | 0.996     |
| Smoking Index | PAD     | rs11768481  | C             | A                | 0.666        | 0.013         | 0.002       | 1.00E-09   | 0.02067      | 0.01079    | 0.05516   |
| Smoking Index | PAD     | rs11783093  | C             | T                | 0.839        | 0.023         | 0.003       | 1.00E-16   | 0.04243      | 0.01429    | 0.002903  |
| Smoking Index | PAD     | rs11861214  | G             | T                | 0.784        | 0.013         | 0.002       | 2.60E-08   | 0.01457      | 0.01241    | 0.24      |
| Smoking Index | PAD     | rs11948770  | T             | C                | 0.768        | -0.015        | 0.002       | 4.00E-10   | -0.01825     | 0.01234    | 0.1393    |
| Smoking Index | PAD     | rs12244388  | G             | A                | 0.661        | -0.019        | 0.002       | 9.60E-20   | -0.001552    | 0.01053    | 0.8829    |
| Smoking Index | PAD     | rs1246265   | T             | C                | 0.305        | -0.013        | 0.002       | 5.30E-09   | 0.01824      | 0.01125    | 0.1051    |
| Smoking Index | PAD     | rs12623702  | A             | G                | 0.613        | -0.014        | 0.002       | 5.70E-12   | 0.004671     | 0.01055    | 0.6578    |
| Smoking Index | PAD     | rs12708665  | A             | G                | 0.285        | -0.013        | 0.002       | 3.40E-09   | -0.01961     | 0.01127    | 0.08163   |

|               |     |             |   |   |       |        |       |          |            |         |          |
|---------------|-----|-------------|---|---|-------|--------|-------|----------|------------|---------|----------|
| Smoking Index | PAD | rs12831617  | C | T | 0.764 | -0.013 | 0.002 | 2.40E-08 | -0.01601   | 0.01213 | 0.1872   |
| Smoking Index | PAD | rs12967855  | A | G | 0.331 | 0.012  | 0.002 | 4.00E-08 | 0.0137     | 0.01139 | 0.2295   |
| Smoking Index | PAD | rs13009008  | A | G | 0.328 | 0.012  | 0.002 | 6.40E-09 | 0.002786   | 0.01071 | 0.7948   |
| Smoking Index | PAD | rs13016665  | C | A | 0.577 | -0.012 | 0.002 | 1.40E-09 | -0.009174  | 0.01059 | 0.3866   |
| Smoking Index | PAD | rs13296519  | G | T | 0.606 | -0.014 | 0.002 | 1.40E-11 | -0.0139    | 0.01044 | 0.1831   |
| Smoking Index | PAD | rs136233    | A | G | 0.809 | -0.014 | 0.003 | 2.70E-08 | -0.001754  | 0.01297 | 0.8924   |
| Smoking Index | PAD | rs147412694 | G | A | 0.85  | -0.017 | 0.003 | 2.30E-09 | -0.0174    | 0.01552 | 0.2629   |
| Smoking Index | PAD | rs17309874  | G | A | 0.74  | -0.016 | 0.002 | 5.60E-13 | -0.01666   | 0.01174 | 0.1561   |
| Smoking Index | PAD | rs17553262  | A | C | 0.885 | -0.018 | 0.003 | 6.90E-09 | 0.01191    | 0.01974 | 0.546    |
| Smoking Index | PAD | rs17576594  | G | A | 0.724 | 0.016  | 0.002 | 1.90E-12 | -0.0108    | 0.01166 | 0.3548   |
| Smoking Index | PAD | rs1827535   | T | G | 0.686 | -0.012 | 0.002 | 1.20E-08 | -0.008078  | 0.01134 | 0.4764   |
| Smoking Index | PAD | rs1922018   | C | T | 0.364 | 0.014  | 0.002 | 2.50E-12 | -0.0003203 | 0.01049 | 0.9757   |
| Smoking Index | PAD | rs1931263   | G | T | 0.51  | -0.011 | 0.002 | 4.00E-08 | 0.003646   | 0.01013 | 0.7189   |
| Smoking Index | PAD | rs1933270   | T | G | 0.364 | 0.013  | 0.002 | 1.70E-10 | 0.00178    | 0.01082 | 0.8694   |
| Smoking Index | PAD | rs202645    | A | G | 0.203 | -0.015 | 0.002 | 5.00E-09 | 0.007542   | 0.01254 | 0.5478   |
| Smoking Index | PAD | rs2062882   | G | A | 0.587 | -0.012 | 0.002 | 1.00E-08 | 0.01507    | 0.0109  | 0.1668   |
| Smoking Index | PAD | rs215600    | G | A | 0.358 | 0.017  | 0.002 | 2.00E-15 | -0.002176  | 0.01063 | 0.8378   |
| Smoking Index | PAD | rs2160896   | C | T | 0.317 | -0.012 | 0.002 | 2.20E-08 | 0.003263   | 0.01097 | 0.7662   |
| Smoking Index | PAD | rs2254710   | C | A | 0.236 | 0.013  | 0.002 | 3.00E-08 | 0.01022    | 0.0122  | 0.4026   |
| Smoking Index | PAD | rs245774    | A | G | 0.272 | -0.013 | 0.002 | 9.00E-09 | -0.03165   | 0.01212 | 0.008915 |
| Smoking Index | PAD | rs2675638   | G | A | 0.581 | 0.012  | 0.002 | 1.20E-09 | -0.005877  | 0.01024 | 0.5661   |
| Smoking Index | PAD | rs2838834   | C | T | 0.699 | -0.013 | 0.002 | 9.20E-10 | -0.00723   | 0.01099 | 0.5108   |
| Smoking Index | PAD | rs28485305  | C | T | 0.631 | 0.011  | 0.002 | 2.80E-08 | -0.001375  | 0.01057 | 0.8965   |
| Smoking Index | PAD | rs2867112   | T | G | 0.835 | 0.021  | 0.003 | 8.30E-15 | 0.04515    | 0.01392 | 0.001137 |
| Smoking Index | PAD | rs2890772   | G | T | 0.413 | -0.02  | 0.002 | 3.60E-22 | -0.02068   | 0.01072 | 0.05367  |

|               |     |            |   |   |       |        |       |          |           |         |            |
|---------------|-----|------------|---|---|-------|--------|-------|----------|-----------|---------|------------|
| Smoking Index | PAD | rs326341   | G | A | 0.525 | 0.014  | 0.002 | 8.70E-12 | 0.008683  | 0.01042 | 0.4048     |
| Smoking Index | PAD | rs329120   | C | T | 0.581 | 0.014  | 0.002 | 5.80E-12 | 0.0002788 | 0.01034 | 0.9785     |
| Smoking Index | PAD | rs348809   | A | G | 0.348 | -0.012 | 0.002 | 1.90E-08 | -0.03062  | 0.01069 | 0.004137   |
| Smoking Index | PAD | rs35120974 | A | G | 0.583 | -0.012 | 0.002 | 2.10E-09 | 0.0151    | 0.01023 | 0.1397     |
| Smoking Index | PAD | rs35175834 | G | A | 0.788 | -0.024 | 0.002 | 4.80E-22 | -0.02592  | 0.01225 | 0.0346     |
| Smoking Index | PAD | rs35343344 | C | A | 0.733 | 0.013  | 0.002 | 1.00E-08 | 0.02666   | 0.01257 | 0.03366    |
| Smoking Index | PAD | rs359243   | T | C | 0.393 | -0.013 | 0.002 | 8.30E-10 | 0.00472   | 0.01056 | 0.655      |
| Smoking Index | PAD | rs369230   | G | T | 0.308 | -0.013 | 0.002 | 2.00E-09 | -0.004333 | 0.01162 | 0.7092     |
| Smoking Index | PAD | rs3742365  | T | C | 0.595 | -0.016 | 0.002 | 2.30E-14 | -0.01048  | 0.01074 | 0.3294     |
| Smoking Index | PAD | rs3811038  | T | C | 0.724 | -0.014 | 0.002 | 9.20E-10 | -0.01765  | 0.0115  | 0.1252     |
| Smoking Index | PAD | rs3896224  | A | G | 0.585 | 0.014  | 0.002 | 1.00E-11 | 0.04547   | 0.01074 | 0.00002261 |
| Smoking Index | PAD | rs421983   | T | C | 0.519 | 0.013  | 0.002 | 3.10E-10 | 0.01124   | 0.01012 | 0.2664     |
| Smoking Index | PAD | rs4391802  | A | G | 0.707 | 0.015  | 0.002 | 1.30E-11 | 0.007948  | 0.01195 | 0.5059     |
| Smoking Index | PAD | rs4543592  | T | C | 0.52  | -0.012 | 0.002 | 4.90E-10 | -0.002519 | 0.01021 | 0.8052     |
| Smoking Index | PAD | rs4571506  | C | T | 0.54  | 0.011  | 0.002 | 1.60E-08 | 0.006118  | 0.0104  | 0.5563     |
| Smoking Index | PAD | rs4671357  | T | C | 0.519 | -0.014 | 0.002 | 1.10E-11 | -0.0209   | 0.01039 | 0.04428    |
| Smoking Index | PAD | rs4814873  | C | T | 0.767 | 0.014  | 0.002 | 2.70E-09 | 0.01488   | 0.01205 | 0.2168     |
| Smoking Index | PAD | rs4949465  | T | C | 0.87  | -0.017 | 0.003 | 1.50E-08 | -0.01876  | 0.01518 | 0.2171     |
| Smoking Index | PAD | rs4957528  | A | C | 0.208 | -0.015 | 0.002 | 4.50E-09 | -0.000419 | 0.01329 | 0.9748     |
| Smoking Index | PAD | rs549845   | G | A | 0.301 | 0.016  | 0.002 | 9.90E-14 | 0.01163   | 0.01094 | 0.2883     |
| Smoking Index | PAD | rs6011779  | C | T | 0.191 | 0.028  | 0.003 | 1.60E-27 | 0.026     | 0.01272 | 0.04133    |
| Smoking Index | PAD | rs60952428 | T | C | 0.909 | 0.019  | 0.003 | 3.40E-08 | 0.01718   | 0.0179  | 0.3363     |
| Smoking Index | PAD | rs6119897  | G | A | 0.762 | -0.018 | 0.002 | 3.10E-15 | -0.003401 | 0.01185 | 0.7741     |
| Smoking Index | PAD | rs62098013 | G | A | 0.64  | -0.012 | 0.002 | 5.60E-09 | -0.01932  | 0.01124 | 0.08583    |
| Smoking Index | PAD | rs62135536 | C | T | 0.968 | 0.035  | 0.006 | 6.80E-10 | 0.01148   | 0.03157 | 0.7159     |
| Smoking Index | PAD | rs62155874 | A | G | 0.873 | -0.024 | 0.003 | 4.00E-16 | -0.01355  | 0.01574 | 0.3898     |
| Smoking Index | PAD | rs62175972 | T | C | 0.966 | 0.031  | 0.006 | 1.70E-08 | 0.01678   | 0.02923 | 0.5651     |

|               |     |                |   |   |       |           |       |          |                    |         |          |
|---------------|-----|----------------|---|---|-------|-----------|-------|----------|--------------------|---------|----------|
| Smoking Index | PAD | rs624833       | T | G | 0.695 | 0.013     | 0.002 | 9.20E-10 | 0.0309             | 0.01111 | 0.005333 |
| Smoking Index | PAD | rs6598539      | T | C | 0.489 | -0.012    | 0.002 | 3.70E-09 | -0.02884           | 0.0102  | 0.004695 |
| Smoking Index | PAD | rs6741228      | T | C | 0.433 | 0.011     | 0.002 | 1.70E-08 | 0.01758            | 0.01061 | 0.09752  |
| Smoking Index | PAD | rs6759606<br>7 | G | A | 0.649 | -0.013    | 0.002 | 1.10E-09 | -0.01481           | 0.01074 | 0.168    |
| Smoking Index | PAD | rs6778080      | T | C | 0.267 | 0.016     | 0.002 | 2.10E-12 | 0.004017           | 0.01135 | 0.7235   |
| Smoking Index | PAD | rs6779302      | G | T | 0.633 | -0.013    | 0.002 | 1.40E-09 | -0.01217           | 0.0106  | 0.2513   |
| Smoking Index | PAD | rs6935954      | A | G | 0.421 | 0.014     | 0.002 | 9.60E-12 | -0.003373          | 0.01023 | 0.7416   |
| Smoking Index | PAD | rs6957896      | C | T | 0.503 | -0.011    | 0.002 | 1.90E-08 | 0.001631           | 0.01017 | 0.8726   |
| Smoking Index | PAD | rs6962772      | A | G | 0.846 | 0.016     | 0.003 | 8.60E-09 | -0.005086          | 0.01408 | 0.718    |
| Smoking Index | PAD | rs7039819      | G | A | 0.427 | 0.013     | 0.002 | 5.20E-10 | -0.006572          | 0.01052 | 0.5323   |
| Smoking Index | PAD | rs7077678      | C | T | 0.623 | 0.012     | 0.002 | 2.40E-09 | 0.006004           | 0.01067 | 0.5737   |
| Smoking Index | PAD | rs7136754<br>5 | G | A | 0.791 | -0.015    | 0.002 | 1.70E-09 | -0.01171           | 0.01261 | 0.3534   |
| Smoking Index | PAD | rs7144406      | A | G | 0.791 | -0.013    | 0.002 | 4.20E-08 | -<br>0.000652<br>5 | 0.01273 | 0.9591   |
| Smoking Index | PAD | rs7155595      | A | C | 0.674 | -0.013    | 0.002 | 3.40E-09 | -0.01944           | 0.01092 | 0.07521  |
| Smoking Index | PAD | rs7267886<br>4 | G | A | 0.829 | 0.018     | 0.003 | 1.70E-11 | 0.02147            | 0.0141  | 0.1272   |
| Smoking Index | PAD | rs7297175      | T | C | 0.431 | -0.012    | 0.002 | 1.10E-08 | 0.005548           | 0.01024 | 0.5881   |
| Smoking Index | PAD | rs732083       | G | A | 0.333 | 0.012     | 0.002 | 1.40E-08 | 0.01443            | 0.01081 | 0.1823   |
| Smoking Index | PAD | rs7322054<br>4 | A | C | 0.842 | -0.016    | 0.003 | 1.50E-08 | -0.01451           | 0.01472 | 0.3248   |
| Smoking Index | PAD | rs7408691<br>1 | G | A | 0.925 | 0.021     | 0.004 | 2.00E-08 | 0.05246            | 0.01975 | 0.007594 |
| Smoking Index | PAD | rs7528604      | G | A | 0.566 | 0.014     | 0.002 | 6.60E-12 | 0.002456           | 0.01028 | 0.8112   |
| Smoking Index | PAD | rs7553348      | G | A | 0.438 | 0.014     | 0.002 | 5.90E-12 | 0.009282           | 0.01035 | 0.3697   |
| Smoking Index | PAD | rs7569203      | A | C | 0.689 | -0.016    | 0.002 | 5.50E-13 | -0.02465           | 0.01102 | 0.02543  |
| Smoking Index | PAD | rs7574240<br>6 | G | A | 0.739 | 0.014     | 0.002 | 1.20E-09 | -0.01245           | 0.0121  | 0.3042   |
| Smoking Index | PAD | rs7660858<br>2 | C | A | 0.953 | 0.031     | 0.005 | 3.40E-10 | 0.01947            | 0.02406 | 0.4175   |
| Smoking Index | PAD | rs7766610      | C | A | 0.183 | 0.018     | 0.003 | 2.40E-12 | 0.03032            | 0.01319 | 0.02173  |
| Smoking Index | PAD | rs7775552      | A | G | 0.513 | -1.20E-02 | 0.002 | 2.50E-09 | -0.01445           | 0.01012 | 0.1533   |
| Smoking Index | PAD | rs7807019      | A | G | 0.54  | -0.015    | 0.002 | 7.50E-14 | -0.02599           | 0.01026 | 0.01131  |
| Smoking Index | PAD | rs8042849      | C | T | 0.342 | 2.80E-02  | 0.002 | 2.40E-39 | 0.05263            | 0.01072 | 9.38E-07 |

|               |            |                 |   |   |       |        |       |          |                    |         |          |
|---------------|------------|-----------------|---|---|-------|--------|-------|----------|--------------------|---------|----------|
| Smoking Index | PAD        | rs860326        | C | T | 0.428 | 0.012  | 0.002 | 3.20E-09 | 0.005334           | 0.01035 | 0.6064   |
| Smoking Index | PAD        | rs889398        | C | T | 0.588 | 0.013  | 0.002 | 3.90E-11 | 0.05439            | 0.01063 | 3.04E-07 |
| Smoking Index | PAD        | rs912780        | T | G | 0.65  | 0.012  | 0.002 | 8.50E-09 | -0.004179          | 0.01069 | 0.696    |
| Smoking Index | PAD        | rs9842947       | C | T | 0.326 | -0.012 | 0.002 | 4.40E-09 | -0.01687           | 0.01141 | 0.1391   |
| Smoking Index | PAD        | rs986391        | G | A | 0.367 | 0.016  | 0.002 | 1.30E-14 | 0.02285            | 0.01052 | 0.02987  |
| Smoking Index | PAD        | rs9904288       | T | C | 0.708 | 0.012  | 0.002 | 2.40E-08 | 0.0318             | 0.0112  | 0.004475 |
| Smoking Index | PAD        | rs9919670       | G | A | 0.612 | -0.022 | 0.002 | 2.10E-26 | -<br>0.000918<br>2 | 0.01044 | 0.9299   |
| Smoking Index | STROK<br>E | rs1028229<br>2  | C | T | 0.362 | 0.013  | 0.002 | 7.10E-10 | -0.0212            | 0.0208  | 0.3068   |
| Smoking Index | STROK<br>E | rs1050847       | C | T | 0.426 | 0.011  | 0.002 | 1.80E-08 | 0.0238             | 0.0245  | 0.3316   |
| Smoking Index | STROK<br>E | rs1051604<br>4  | G | C | 0.884 | -0.02  | 0.003 | 2.00E-10 | 0.0011             | 0.0346  | 0.9754   |
| Smoking Index | STROK<br>E | rs1087987<br>1  | T | G | 0.343 | -0.014 | 0.002 | 5.60E-11 | -0.0024            | 0.0209  | 0.9078   |
| Smoking Index | STROK<br>E | rs1091870<br>1  | G | A | 0.372 | 0.012  | 0.002 | 2.00E-08 | 0.0127             | 0.0209  | 0.5439   |
| Smoking Index | STROK<br>E | rs1112432<br>90 | T | C | 0.963 | -0.029 | 0.005 | 4.30E-08 | -0.042             | 0.0586  | 0.4735   |
| Smoking Index | STROK<br>E | rs1118814       | G | A | 0.324 | 0.012  | 0.002 | 1.40E-08 | 0.0176             | 0.0214  | 0.4099   |
| Smoking Index | STROK<br>E | rs1121022<br>9  | A | G | 0.384 | 0.017  | 0.002 | 2.80E-16 | -0.0036            | 0.0208  | 0.8638   |
| Smoking Index | STROK<br>E | rs1122822<br>19 | G | A | 0.959 | -0.033 | 0.005 | 3.70E-11 | -0.094             | 0.0674  | 0.1631   |
| Smoking Index | STROK<br>E | rs1125590<br>8  | T | G | 0.743 | -0.015 | 0.002 | 1.90E-10 | 0.0203             | 0.023   | 0.3767   |
| Smoking Index | STROK<br>E | rs1133824<br>19 | C | A | 0.889 | -0.041 | 0.003 | 9.70E-38 | -0.0143            | 0.0444  | 0.7474   |
| Smoking Index | STROK<br>E | rs1149331       | G | A | 0.477 | -0.011 | 0.002 | 3.20E-08 | -0.0332            | 0.0221  | 0.1327   |
| Smoking Index | STROK<br>E | rs1176848<br>1  | C | A | 0.666 | 0.013  | 0.002 | 1.00E-09 | -0.0331            | 0.0261  | 0.2044   |
| Smoking Index | STROK<br>E | rs1178309<br>3  | C | T | 0.839 | 0.023  | 0.003 | 1.00E-16 | 0.016              | 0.0332  | 0.6306   |

|               |        |             |   |   |       |        |       |          |         |        |            |
|---------------|--------|-------------|---|---|-------|--------|-------|----------|---------|--------|------------|
| Smoking Index | STROKE | rs11861214  | G | T | 0.784 | 0.013  | 0.002 | 2.60E-08 | -0.0404 | 0.0233 | 0.0821997  |
| Smoking Index | STROKE | rs11948770  | T | C | 0.768 | -0.015 | 0.002 | 4.00E-10 | 0.007   | 0.0242 | 0.7718     |
| Smoking Index | STROKE | rs1221148   | C | G | 0.587 | 0.013  | 0.002 | 4.60E-11 | -0.0311 | 0.0204 | 0.1271     |
| Smoking Index | STROKE | rs12244388  | G | A | 0.661 | -0.019 | 0.002 | 9.60E-20 | 0.0254  | 0.0201 | 0.2059     |
| Smoking Index | STROKE | rs1246265   | T | C | 0.305 | -0.013 | 0.002 | 5.30E-09 | -0.0432 | 0.0222 | 0.0516904  |
| Smoking Index | STROKE | rs12481282  | G | C | 0.722 | -0.013 | 0.002 | 7.80E-09 | -0.0071 | 0.0221 | 0.75       |
| Smoking Index | STROKE | rs12623702  | A | G | 0.613 | -0.014 | 0.002 | 5.70E-12 | 0.0494  | 0.0213 | 0.0203498  |
| Smoking Index | STROKE | rs12708665  | A | G | 0.285 | -0.013 | 0.002 | 3.40E-09 | -0.0022 | 0.0244 | 0.9292     |
| Smoking Index | STROKE | rs12831617  | C | T | 0.764 | -0.013 | 0.002 | 2.40E-08 | -0.037  | 0.026  | 0.1548     |
| Smoking Index | STROKE | rs12967855  | A | G | 0.331 | 0.012  | 0.002 | 4.00E-08 | -0.007  | 0.0219 | 0.7485     |
| Smoking Index | STROKE | rs13009008  | A | G | 0.328 | 0.012  | 0.002 | 6.40E-09 | -0.0029 | 0.0212 | 0.8921     |
| Smoking Index | STROKE | rs13016665  | C | A | 0.577 | -0.012 | 0.002 | 1.40E-09 | -0.0572 | 0.0203 | 0.00487697 |
| Smoking Index | STROKE | rs13296519  | G | T | 0.606 | -0.014 | 0.002 | 1.40E-11 | -0.0079 | 0.0223 | 0.725      |
| Smoking Index | STROKE | rs136233    | A | G | 0.809 | -0.014 | 0.003 | 2.70E-08 | 0.04    | 0.0269 | 0.1369     |
| Smoking Index | STROKE | rs147412694 | G | A | 0.85  | -0.017 | 0.003 | 2.30E-09 | 0.0307  | 0.0341 | 0.3687     |
| Smoking Index | STROKE | rs17309874  | G | A | 0.74  | -0.016 | 0.002 | 5.60E-13 | -0.0015 | 0.0281 | 0.9568     |
| Smoking Index | STROKE | rs17553262  | A | C | 0.885 | -0.018 | 0.003 | 6.90E-09 | -0.0313 | 0.0334 | 0.3484     |
| Smoking Index | STROKE | rs17576594  | G | A | 0.724 | 0.016  | 0.002 | 1.90E-12 | -0.01   | 0.0227 | 0.6607     |

|               |            |                |   |   |       |        |       |          |         |        |               |
|---------------|------------|----------------|---|---|-------|--------|-------|----------|---------|--------|---------------|
| Smoking Index | STROK<br>E | rs1827535      | T | G | 0.686 | -0.012 | 0.002 | 1.20E-08 | 0.0081  | 0.0251 | 0.7462        |
| Smoking Index | STROK<br>E | rs1922018      | C | T | 0.364 | 0.014  | 0.002 | 2.50E-12 | -0.0176 | 0.0217 | 0.4157        |
| Smoking Index | STROK<br>E | rs1931263      | G | T | 0.51  | -0.011 | 0.002 | 4.00E-08 | 0.0353  | 0.0232 | 0.1277        |
| Smoking Index | STROK<br>E | rs1933270      | T | G | 0.364 | 0.013  | 0.002 | 1.70E-10 | 0.0225  | 0.0208 | 0.2781        |
| Smoking Index | STROK<br>E | rs202645       | A | G | 0.203 | -0.015 | 0.002 | 5.00E-09 | 0.0144  | 0.0278 | 0.6052        |
| Smoking Index | STROK<br>E | rs2062882      | G | A | 0.587 | -0.012 | 0.002 | 1.00E-08 | 0.0432  | 0.021  | 0.039720<br>1 |
| Smoking Index | STROK<br>E | rs2080870      | A | T | 0.258 | 0.012  | 0.002 | 4.50E-08 | -0.0263 | 0.0265 | 0.3219        |
| Smoking Index | STROK<br>E | rs215600       | G | A | 0.358 | 0.017  | 0.002 | 2.00E-15 | 0.0142  | 0.0207 | 0.4932        |
| Smoking Index | STROK<br>E | rs2160896      | C | T | 0.317 | -0.012 | 0.002 | 2.20E-08 | 0.0191  | 0.021  | 0.365         |
| Smoking Index | STROK<br>E | rs2254710      | C | A | 0.236 | 0.013  | 0.002 | 3.00E-08 | 0.0251  | 0.0229 | 0.272         |
| Smoking Index | STROK<br>E | rs245774       | A | G | 0.272 | -0.013 | 0.002 | 9.00E-09 | 0.0046  | 0.0248 | 0.8523        |
| Smoking Index | STROK<br>E | rs2675638      | G | A | 0.581 | 0.012  | 0.002 | 1.20E-09 | 0.0289  | 0.0205 | 0.1573        |
| Smoking Index | STROK<br>E | rs2838834      | C | T | 0.699 | -0.013 | 0.002 | 9.20E-10 | 0.0098  | 0.0221 | 0.6584        |
| Smoking Index | STROK<br>E | rs2848530<br>5 | C | T | 0.631 | 0.011  | 0.002 | 2.80E-08 | 0.0354  | 0.0205 | 0.084009<br>8 |
| Smoking Index | STROK<br>E | rs2867112      | T | G | 0.835 | 0.021  | 0.003 | 8.30E-15 | 0.0123  | 0.0281 | 0.662599      |
| Smoking Index | STROK<br>E | rs2890772      | G | T | 0.413 | -0.02  | 0.002 | 3.60E-22 | -0.0104 | 0.0206 | 0.6132        |
| Smoking Index | STROK<br>E | rs2894808      | T | A | 0.922 | -0.022 | 0.004 | 4.50E-09 | -0.0155 | 0.0381 | 0.6831        |
| Smoking Index | STROK<br>E | rs317021       | T | A | 0.814 | -0.017 | 0.003 | 6.80E-11 | -0.0474 | 0.0328 | 0.148         |

|               |        |            |   |   |       |        |       |          |         |        |           |
|---------------|--------|------------|---|---|-------|--------|-------|----------|---------|--------|-----------|
| Smoking Index | STROKE | rs326341   | G | A | 0.525 | 0.014  | 0.002 | 8.70E-12 | 0.023   | 0.0201 | 0.2525    |
| Smoking Index | STROKE | rs329120   | C | T | 0.581 | 0.014  | 0.002 | 5.80E-12 | -0.0105 | 0.0199 | 0.5975    |
| Smoking Index | STROKE | rs348809   | A | G | 0.348 | -0.012 | 0.002 | 1.90E-08 | 0.0187  | 0.0215 | 0.3856    |
| Smoking Index | STROKE | rs35120974 | A | G | 0.583 | -0.012 | 0.002 | 2.10E-09 | -0.03   | 0.0204 | 0.1415    |
| Smoking Index | STROKE | rs35169606 | T | G | 0.612 | 0.013  | 0.002 | 1.20E-09 | 0.0426  | 0.0248 | 0.0860796 |
| Smoking Index | STROKE | rs35175834 | G | A | 0.788 | -0.024 | 0.002 | 4.80E-22 | -0.0096 | 0.0274 | 0.7259    |
| Smoking Index | STROKE | rs35343344 | C | A | 0.733 | 0.013  | 0.002 | 1.00E-08 | 0.0108  | 0.0238 | 0.6511    |
| Smoking Index | STROKE | rs359243   | T | C | 0.393 | -0.013 | 0.002 | 8.30E-10 | -0.0043 | 0.0222 | 0.8453    |
| Smoking Index | STROKE | rs369230   | G | T | 0.308 | -0.013 | 0.002 | 2.00E-09 | 0.0347  | 0.0237 | 0.1434    |
| Smoking Index | STROKE | rs3742365  | T | C | 0.595 | -0.016 | 0.002 | 2.30E-14 | -0.0012 | 0.0203 | 0.9539    |
| Smoking Index | STROKE | rs3811038  | T | C | 0.724 | -0.014 | 0.002 | 9.20E-10 | 0.011   | 0.0242 | 0.649999  |
| Smoking Index | STROKE | rs3896224  | A | G | 0.585 | 0.014  | 0.002 | 1.00E-11 | -0.0021 | 0.0203 | 0.9177    |
| Smoking Index | STROKE | rs421983   | T | C | 0.519 | 0.013  | 0.002 | 3.10E-10 | 0.0095  | 0.02   | 0.6351    |
| Smoking Index | STROKE | rs4391802  | A | G | 0.707 | 0.015  | 0.002 | 1.30E-11 | 0.0467  | 0.0228 | 0.0405098 |
| Smoking Index | STROKE | rs4473348  | A | T | 0.25  | -0.015 | 0.002 | 9.00E-11 | 0.0351  | 0.0235 | 0.135     |
| Smoking Index | STROKE | rs4543592  | T | C | 0.52  | -0.012 | 0.002 | 4.90E-10 | 0.0268  | 0.023  | 0.2449    |
| Smoking Index | STROKE | rs4571506  | C | T | 0.54  | 0.011  | 0.002 | 1.60E-08 | 0.01    | 0.0199 | 0.614601  |
| Smoking Index | STROKE | rs4671357  | T | C | 0.519 | -0.014 | 0.002 | 1.10E-11 | -0.0065 | 0.02   | 0.743901  |



|               |        |            |   |   |       |        |       |          |         |        |           |
|---------------|--------|------------|---|---|-------|--------|-------|----------|---------|--------|-----------|
| Smoking Index | STROKE | rs4814873  | C | T | 0.767 | 0.014  | 0.002 | 2.70E-09 | 0.0296  | 0.0239 | 0.2157    |
| Smoking Index | STROKE | rs4949465  | T | C | 0.87  | -0.017 | 0.003 | 1.50E-08 | 0.0166  | 0.0282 | 0.5562    |
| Smoking Index | STROKE | rs4957528  | A | C | 0.208 | -0.015 | 0.002 | 4.50E-09 | 0.0042  | 0.0298 | 0.8883    |
| Smoking Index | STROKE | rs549845   | G | A | 0.301 | 0.016  | 0.002 | 9.90E-14 | 0.0415  | 0.0212 | 0.0503999 |
| Smoking Index | STROKE | rs6011779  | C | T | 0.191 | 0.028  | 0.003 | 1.60E-27 | 0.0023  | 0.0288 | 0.9365    |
| Smoking Index | STROKE | rs60952428 | T | C | 0.909 | 0.019  | 0.003 | 3.40E-08 | 0.0086  | 0.029  | 0.7663    |
| Smoking Index | STROKE | rs6119897  | G | A | 0.762 | -0.018 | 0.002 | 3.10E-15 | -0.0001 | 0.0238 | 0.9968    |
| Smoking Index | STROKE | rs62098013 | G | A | 0.64  | -0.012 | 0.002 | 5.60E-09 | 0.0101  | 0.0246 | 0.6806    |
| Smoking Index | STROKE | rs62155874 | A | G | 0.873 | -0.024 | 0.003 | 4.00E-16 | 0.0044  | 0.0354 | 0.9009    |
| Smoking Index | STROKE | rs62175972 | T | C | 0.966 | 0.031  | 0.006 | 1.70E-08 | 0.0949  | 0.0807 | 0.2399    |
| Smoking Index | STROKE | rs624833   | T | G | 0.695 | 0.013  | 0.002 | 9.20E-10 | -0.0012 | 0.0251 | 0.9629    |
| Smoking Index | STROKE | rs6598539  | T | C | 0.489 | -0.012 | 0.002 | 3.70E-09 | 0.0078  | 0.0203 | 0.701601  |
| Smoking Index | STROKE | rs6741228  | T | C | 0.433 | 0.011  | 0.002 | 1.70E-08 | 0.0185  | 0.0204 | 0.3656    |
| Smoking Index | STROKE | rs67596067 | G | A | 0.649 | -0.013 | 0.002 | 1.10E-09 | -0.0215 | 0.022  | 0.328     |
| Smoking Index | STROKE | rs6778080  | T | C | 0.267 | 0.016  | 0.002 | 2.10E-12 | -0.0511 | 0.0278 | 0.0665197 |
| Smoking Index | STROKE | rs6935954  | A | G | 0.421 | 0.014  | 0.002 | 9.60E-12 | -0.0487 | 0.0232 | 0.0361901 |
| Smoking Index | STROKE | rs6957896  | C | T | 0.503 | -0.011 | 0.002 | 1.90E-08 | 0.0018  | 0.0226 | 0.9351    |
| Smoking Index | STROKE | rs6962772  | A | G | 0.846 | 0.016  | 0.003 | 8.60E-09 | 0.0363  | 0.0266 | 0.173     |

|               |            |                |   |   |       |        |       |          |         |        |               |
|---------------|------------|----------------|---|---|-------|--------|-------|----------|---------|--------|---------------|
| Smoking Index | STROK<br>E | rs7039819      | G | A | 0.427 | 0.013  | 0.002 | 5.20E-10 | 0.0098  | 0.0206 | 0.632501      |
| Smoking Index | STROK<br>E | rs7077678      | C | T | 0.623 | 0.012  | 0.002 | 2.40E-09 | -0.0056 | 0.0205 | 0.785301      |
| Smoking Index | STROK<br>E | rs7136754<br>5 | G | A | 0.791 | -0.015 | 0.002 | 1.70E-09 | -0.0394 | 0.0285 | 0.167         |
| Smoking Index | STROK<br>E | rs7144406      | A | G | 0.791 | -0.013 | 0.002 | 4.20E-08 | -0.025  | 0.0307 | 0.4156        |
| Smoking Index | STROK<br>E | rs7155595      | A | C | 0.674 | -0.013 | 0.002 | 3.40E-09 | -0.0549 | 0.0237 | 0.020300<br>2 |
| Smoking Index | STROK<br>E | rs7267886<br>4 | G | A | 0.829 | 0.018  | 0.003 | 1.70E-11 | 0.0311  | 0.0337 | 0.356         |
| Smoking Index | STROK<br>E | rs7297175      | T | C | 0.431 | -0.012 | 0.002 | 1.10E-08 | -0.0247 | 0.0215 | 0.2517        |
| Smoking Index | STROK<br>E | rs732083       | G | A | 0.333 | 0.012  | 0.002 | 1.40E-08 | 0.0258  | 0.0214 | 0.2281        |
| Smoking Index | STROK<br>E | rs7322054<br>4 | A | C | 0.842 | -0.016 | 0.003 | 1.50E-08 | -0.0699 | 0.0289 | 0.015760<br>1 |
| Smoking Index | STROK<br>E | rs7333559      | G | A | 0.212 | 0.015  | 0.002 | 5.30E-10 | -0.0158 | 0.0253 | 0.531401      |
| Smoking Index | STROK<br>E | rs7408691<br>1 | G | A | 0.925 | 0.021  | 0.004 | 2.00E-08 | 0.0525  | 0.043  | 0.222         |
| Smoking Index | STROK<br>E | rs7528604      | G | A | 0.566 | 0.014  | 0.002 | 6.60E-12 | 0.0229  | 0.0201 | 0.2533        |
| Smoking Index | STROK<br>E | rs7553348      | G | A | 0.438 | 0.014  | 0.002 | 5.90E-12 | -0.0052 | 0.0228 | 0.8208        |
| Smoking Index | STROK<br>E | rs7569203      | A | C | 0.689 | -0.016 | 0.002 | 5.50E-13 | 0.0062  | 0.0216 | 0.7732        |
| Smoking Index | STROK<br>E | rs7574240<br>6 | G | A | 0.739 | 0.014  | 0.002 | 1.20E-09 | -0.0381 | 0.0224 | 0.089041      |
| Smoking Index | STROK<br>E | rs7660858<br>2 | C | A | 0.953 | 0.031  | 0.005 | 3.40E-10 | 0.0348  | 0.0801 | 0.664         |
| Smoking Index | STROK<br>E | rs7766610      | C | A | 0.183 | 0.018  | 0.003 | 2.40E-12 | -0.0133 | 0.0233 | 0.568         |
| Smoking Index | STROK<br>E | rs7775552      | A | G | 0.513 | -0.012 | 0.002 | 2.50E-09 | -0.0204 | 0.0204 | 0.317         |

|               |            |                 |   |   |       |        |       |          |           |               |               |
|---------------|------------|-----------------|---|---|-------|--------|-------|----------|-----------|---------------|---------------|
| Smoking Index | STROK<br>E | rs7807019       | A | G | 0.54  | -0.015 | 0.002 | 7.50E-14 | 0.0001    | 0.0201        | 0.9977        |
| Smoking Index | STROK<br>E | rs8042134       | T | G | 0.541 | -0.014 | 0.002 | 2.20E-12 | 0.0438    | 0.0212        | 0.038979<br>8 |
| Smoking Index | STROK<br>E | rs8042849       | C | T | 0.342 | 0.028  | 0.002 | 2.40E-39 | 0.0173    | 0.0223        | 0.4364        |
| Smoking Index | STROK<br>E | rs860326        | C | T | 0.428 | 0.012  | 0.002 | 3.20E-09 | 0.0142    | 0.021         | 0.4971        |
| Smoking Index | STROK<br>E | rs8614          | C | A | 0.818 | -0.017 | 0.003 | 1.50E-10 | -0.0106   | 0.024         | 0.6592        |
| Smoking Index | STROK<br>E | rs889398        | C | T | 0.588 | 0.013  | 0.002 | 3.90E-11 | 0.0454    | 0.0217        | 0.036800<br>2 |
| Smoking Index | STROK<br>E | rs912780        | T | G | 0.65  | 0.012  | 0.002 | 8.50E-09 | 0.0349    | 0.0205        | 0.088369      |
| Smoking Index | STROK<br>E | rs9435340       | T | A | 0.344 | 0.012  | 0.002 | 1.00E-08 | 0.0069    | 0.0212        | 0.7438        |
| Smoking Index | STROK<br>E | rs9842947       | C | T | 0.326 | -0.012 | 0.002 | 4.40E-09 | -0.0075   | 0.0223        | 0.7364        |
| Smoking Index | STROK<br>E | rs986391        | G | A | 0.367 | 0.016  | 0.002 | 1.30E-14 | 0.0057    | 0.0215        | 0.7904        |
| Smoking Index | STROK<br>E | rs9904288       | T | C | 0.708 | 0.012  | 0.002 | 2.40E-08 | 0.0335    | 0.0226        | 0.1393        |
| Smoking Index | STROK<br>E | rs9919670       | G | A | 0.612 | -0.022 | 0.002 | 2.10E-26 | -0.0378   | 0.0213        | 0.076279<br>9 |
| Smoking Index | CAD        | rs1028229<br>2  | C | T | 0.362 | 0.013  | 0.002 | 7.10E-10 | 0.022719  | 0.009558<br>2 | 0.017457<br>8 |
| Smoking Index | CAD        | rs1087987<br>1  | T | G | 0.343 | -0.014 | 0.002 | 5.60E-11 | -0.002138 | 0.009461<br>5 | 0.821226      |
| Smoking Index | CAD        | rs1091870<br>1  | G | A | 0.372 | 0.012  | 0.002 | 2.00E-08 | 0.023604  | 0.009567<br>9 | 0.013625<br>4 |
| Smoking Index | CAD        | rs1112432<br>90 | T | C | 0.963 | -0.029 | 0.005 | 4.30E-08 | 0.00071   | 0.028205<br>2 | 0.979917      |
| Smoking Index | CAD        | rs1118814       | G | A | 0.324 | 0.012  | 0.002 | 1.40E-08 | -0.003204 | 0.009826<br>5 | 0.744381      |
| Smoking Index | CAD        | rs1121022<br>9  | A | G | 0.384 | 0.017  | 0.002 | 2.80E-16 | 0.000119  | 0.009420<br>2 | 0.989921      |

|               |     |             |   |   |       |        |       |          |           |           |             |
|---------------|-----|-------------|---|---|-------|--------|-------|----------|-----------|-----------|-------------|
| Smoking Index | CAD | rs112282219 | G | A | 0.959 | -0.033 | 0.005 | 3.70E-11 | 0.001997  | 0.0273155 | 0.94172     |
| Smoking Index | CAD | rs11255908  | T | G | 0.743 | -0.015 | 0.002 | 1.90E-10 | 0.010164  | 0.0102002 | 0.319029    |
| Smoking Index | CAD | rs113382419 | C | A | 0.889 | -0.041 | 0.003 | 9.70E-38 | -0.02074  | 0.0189892 | 0.274746    |
| Smoking Index | CAD | rs1149331   | G | A | 0.477 | -0.011 | 0.002 | 3.20E-08 | -0.007664 | 0.0094702 | 0.418355    |
| Smoking Index | CAD | rs11768481  | C | A | 0.666 | 0.013  | 0.002 | 1.00E-09 | 0.014147  | 0.010438  | 0.175312    |
| Smoking Index | CAD | rs11783093  | C | T | 0.839 | 0.023  | 0.003 | 1.00E-16 | 0.034962  | 0.0138305 | 0.0114749   |
| Smoking Index | CAD | rs11861214  | G | T | 0.784 | 0.013  | 0.002 | 2.60E-08 | -0.002208 | 0.0111952 | 0.843649    |
| Smoking Index | CAD | rs11948770  | T | C | 0.768 | -0.015 | 0.002 | 4.00E-10 | 0.005828  | 0.011319  | 0.606633    |
| Smoking Index | CAD | rs1221148   | C | G | 0.587 | 0.013  | 0.002 | 4.60E-11 | -0.000828 | 0.0094973 | 0.930526    |
| Smoking Index | CAD | rs12244388  | G | A | 0.661 | -0.019 | 0.002 | 9.60E-20 | 0.036276  | 0.0094343 | 0.000120501 |
| Smoking Index | CAD | rs1246265   | T | C | 0.305 | -0.013 | 0.002 | 5.30E-09 | -0.009105 | 0.0101448 | 0.369448    |
| Smoking Index | CAD | rs12481282  | G | C | 0.722 | -0.013 | 0.002 | 7.80E-09 | 0.026601  | 0.0103881 | 0.0104455   |
| Smoking Index | CAD | rs12623702  | A | G | 0.613 | -0.014 | 0.002 | 5.70E-12 | 0.008648  | 0.0099101 | 0.382857    |
| Smoking Index | CAD | rs12708665  | A | G | 0.285 | -0.013 | 0.002 | 3.40E-09 | -0.010716 | 0.0106944 | 0.316334    |
| Smoking Index | CAD | rs12831617  | C | T | 0.764 | -0.013 | 0.002 | 2.40E-08 | -0.023783 | 0.0114537 | 0.037853    |
| Smoking Index | CAD | rs12967855  | A | G | 0.331 | 0.012  | 0.002 | 4.00E-08 | -0.009557 | 0.0097124 | 0.325116    |
| Smoking Index | CAD | rs13009008  | A | G | 0.328 | 0.012  | 0.002 | 6.40E-09 | 0.003304  | 0.0101295 | 0.744291    |
| Smoking Index | CAD | rs13016665  | C | A | 0.577 | -0.012 | 0.002 | 1.40E-09 | -0.005148 | 0.0097971 | 0.599264    |

|               |     |                 |   |   |       |        |       |          |           |               |                 |
|---------------|-----|-----------------|---|---|-------|--------|-------|----------|-----------|---------------|-----------------|
| Smoking Index | CAD | rs136233        | A | G | 0.809 | -0.014 | 0.003 | 2.70E-08 | -0.030685 | 0.011942<br>5 | 0.010187<br>8   |
| Smoking Index | CAD | rs1474126<br>94 | G | A | 0.85  | -0.017 | 0.003 | 2.30E-09 | -0.014472 | 0.014130<br>3 | 0.30575         |
| Smoking Index | CAD | rs1730987<br>4  | G | A | 0.74  | -0.016 | 0.002 | 5.60E-13 | -0.024627 | 0.011799<br>2 | 0.036871<br>4   |
| Smoking Index | CAD | rs1755326<br>2  | A | C | 0.885 | -0.018 | 0.003 | 6.90E-09 | 0.004595  | 0.016537<br>5 | 0.781124        |
| Smoking Index | CAD | rs1757659<br>4  | G | A | 0.724 | 0.016  | 0.002 | 1.90E-12 | -0.001252 | 0.010264<br>2 | 0.902917        |
| Smoking Index | CAD | rs1827535       | T | G | 0.686 | -0.012 | 0.002 | 1.20E-08 | -0.013067 | 0.010598<br>8 | 0.217623        |
| Smoking Index | CAD | rs1922018       | C | T | 0.364 | 0.014  | 0.002 | 2.50E-12 | -0.006448 | 0.010022      | 0.519974        |
| Smoking Index | CAD | rs1931263       | G | T | 0.51  | -0.011 | 0.002 | 4.00E-08 | -0.013821 | 0.009799<br>3 | 0.15842         |
| Smoking Index | CAD | rs202645        | A | G | 0.203 | -0.015 | 0.002 | 5.00E-09 | -0.00722  | 0.011254<br>9 | 0.5212          |
| Smoking Index | CAD | rs2062882       | G | A | 0.587 | -0.012 | 0.002 | 1.00E-08 | -0.000649 | 0.009504<br>9 | 0.945562        |
| Smoking Index | CAD | rs2080870       | A | T | 0.258 | 0.012  | 0.002 | 4.50E-08 | -0.014601 | 0.011189<br>8 | 0.191942        |
| Smoking Index | CAD | rs215600        | G | A | 0.358 | 0.017  | 0.002 | 2.00E-15 | 0.014977  | 0.009549<br>5 | 0.116797        |
| Smoking Index | CAD | rs2160896       | C | T | 0.317 | -0.012 | 0.002 | 2.20E-08 | -0.01444  | 0.009765<br>6 | 0.139233        |
| Smoking Index | CAD | rs2254710       | C | A | 0.236 | 0.013  | 0.002 | 3.00E-08 | 0.019446  | 0.010468<br>5 | 0.063228<br>1   |
| Smoking Index | CAD | rs245774        | A | G | 0.272 | -0.013 | 0.002 | 9.00E-09 | -0.011289 | 0.011245<br>2 | 0.315427        |
| Smoking Index | CAD | rs2675638       | G | A | 0.581 | 0.012  | 0.002 | 1.20E-09 | 0.006059  | 0.009276<br>8 | 0.51367         |
| Smoking Index | CAD | rs2838834       | C | T | 0.699 | -0.013 | 0.002 | 9.20E-10 | -0.021708 | 0.009846      | 0.027472        |
| Smoking Index | CAD | rs2867112       | T | G | 0.835 | 0.021  | 0.003 | 8.30E-15 | 0.041434  | 0.012523<br>7 | 0.000938<br>102 |
| Smoking Index | CAD | rs2890772       | G | T | 0.413 | -0.02  | 0.002 | 3.60E-22 | 0.003933  | 0.009736<br>3 | 0.686248        |

|               |     |                |   |   |       |        |       |          |           |               |               |
|---------------|-----|----------------|---|---|-------|--------|-------|----------|-----------|---------------|---------------|
| Smoking Index | CAD | rs2894808      | T | A | 0.922 | -0.022 | 0.004 | 4.50E-09 | -0.004522 | 0.016658<br>1 | 0.786037      |
| Smoking Index | CAD | rs317021       | T | A | 0.814 | -0.017 | 0.003 | 6.80E-11 | -0.000821 | 0.012704      | 0.948472      |
| Smoking Index | CAD | rs326341       | G | A | 0.525 | 0.014  | 0.002 | 8.70E-12 | -0.003695 | 0.009362<br>6 | 0.693099      |
| Smoking Index | CAD | rs329120       | C | T | 0.581 | 0.014  | 0.002 | 5.80E-12 | -0.020066 | 0.009347<br>4 | 0.031817<br>8 |
| Smoking Index | CAD | rs348809       | A | G | 0.348 | -0.012 | 0.002 | 1.90E-08 | -0.006893 | 0.009730<br>9 | 0.478719      |
| Smoking Index | CAD | rs3512097<br>4 | A | G | 0.583 | -0.012 | 0.002 | 2.10E-09 | 0.001829  | 0.009386<br>5 | 0.845507      |
| Smoking Index | CAD | rs3516960<br>6 | T | G | 0.612 | 0.013  | 0.002 | 1.20E-09 | 0.012571  | 0.011193      | 0.26139       |
| Smoking Index | CAD | rs3517583<br>4 | G | A | 0.788 | -0.024 | 0.002 | 4.80E-22 | 0.011184  | 0.012028<br>4 | 0.352473      |
| Smoking Index | CAD | rs3534334<br>4 | C | A | 0.733 | 0.013  | 0.002 | 1.00E-08 | 0.01511   | 0.011240<br>8 | 0.17888       |
| Smoking Index | CAD | rs3742365      | T | C | 0.595 | -0.016 | 0.002 | 2.30E-14 | -0.016205 | 0.009498<br>4 | 0.087993<br>4 |
| Smoking Index | CAD | rs3811038      | T | C | 0.724 | -0.014 | 0.002 | 9.20E-10 | 0.004533  | 0.010968<br>1 | 0.679396      |
| Smoking Index | CAD | rs421983       | T | C | 0.519 | 0.013  | 0.002 | 3.10E-10 | 0.00063   | 0.009154<br>1 | 0.945131      |
| Smoking Index | CAD | rs4391802      | A | G | 0.707 | 0.015  | 0.002 | 1.30E-11 | 0.004798  | 0.010221<br>9 | 0.638794      |
| Smoking Index | CAD | rs4473348      | A | T | 0.25  | -0.015 | 0.002 | 9.00E-11 | -0.020153 | 0.011068<br>1 | 0.068634<br>1 |
| Smoking Index | CAD | rs4671357      | T | C | 0.519 | -0.014 | 0.002 | 1.10E-11 | -0.008261 | 0.009452<br>8 | 0.382161      |
| Smoking Index | CAD | rs4814873      | C | T | 0.767 | 0.014  | 0.002 | 2.70E-09 | 0.021137  | 0.010907<br>3 | 0.052639<br>3 |
| Smoking Index | CAD | rs4949465      | T | C | 0.87  | -0.017 | 0.003 | 1.50E-08 | -0.022869 | 0.012214<br>1 | 0.061158<br>9 |
| Smoking Index | CAD | rs4957528      | A | C | 0.208 | -0.015 | 0.002 | 4.50E-09 | -0.014558 | 0.012746<br>4 | 0.253401      |
| Smoking Index | CAD | rs549845       | G | A | 0.301 | 0.016  | 0.002 | 9.90E-14 | 0.008157  | 0.009827<br>6 | 0.406531      |

|               |     |                |   |   |       |        |       |          |           |               |               |
|---------------|-----|----------------|---|---|-------|--------|-------|----------|-----------|---------------|---------------|
| Smoking Index | CAD | rs6011779      | C | T | 0.191 | 0.028  | 0.003 | 1.60E-27 | 0.018733  | 0.013545<br>9 | 0.166687      |
| Smoking Index | CAD | rs6095242<br>8 | T | C | 0.909 | 0.019  | 0.003 | 3.40E-08 | 0.014414  | 0.013881<br>5 | 0.299104      |
| Smoking Index | CAD | rs6119897      | G | A | 0.762 | -0.018 | 0.002 | 3.10E-15 | -0.020157 | 0.010517<br>3 | 0.055295<br>5 |
| Smoking Index | CAD | rs6209801<br>3 | G | A | 0.64  | -0.012 | 0.002 | 5.60E-09 | -0.008057 | 0.010666<br>2 | 0.450021      |
| Smoking Index | CAD | rs6213553<br>6 | C | T | 0.968 | 0.035  | 0.006 | 6.80E-10 | 0.003779  | 0.029823<br>8 | 0.899169      |
| Smoking Index | CAD | rs6215587<br>4 | A | G | 0.873 | -0.024 | 0.003 | 4.00E-16 | 0.017265  | 0.015390<br>4 | 0.261946      |
| Smoking Index | CAD | rs6217597<br>2 | T | C | 0.966 | 0.031  | 0.006 | 1.70E-08 | 0.030329  | 0.030435<br>3 | 0.319005      |
| Smoking Index | CAD | rs624833       | T | G | 0.695 | 0.013  | 0.002 | 9.20E-10 | 0.010431  | 0.010679<br>2 | 0.328689      |
| Smoking Index | CAD | rs6741228      | T | C | 0.433 | 0.011  | 0.002 | 1.70E-08 | 0.020156  | 0.009340<br>9 | 0.030942<br>1 |
| Smoking Index | CAD | rs6759606<br>7 | G | A | 0.649 | -0.013 | 0.002 | 1.10E-09 | -0.017072 | 0.009959      | 0.086486<br>8 |
| Smoking Index | CAD | rs6778080      | T | C | 0.267 | 0.016  | 0.002 | 2.10E-12 | 0.0106    | 0.011440<br>7 | 0.354177      |
| Smoking Index | CAD | rs6779302      | G | T | 0.633 | -0.013 | 0.002 | 1.40E-09 | 0.002586  | 0.009791<br>7 | 0.791702      |
| Smoking Index | CAD | rs6935954      | A | G | 0.421 | 0.014  | 0.002 | 9.60E-12 | -0.010899 | 0.009891<br>6 | 0.270532      |
| Smoking Index | CAD | rs6957896      | C | T | 0.503 | -0.011 | 0.002 | 1.90E-08 | -0.00727  | 0.009551<br>6 | 0.446582      |
| Smoking Index | CAD | rs6962772      | A | G | 0.846 | 0.016  | 0.003 | 8.60E-09 | 0.008701  | 0.011447<br>2 | 0.447196      |
| Smoking Index | CAD | rs7039819      | G | A | 0.427 | 0.013  | 0.002 | 5.20E-10 | 0.014408  | 0.009486<br>5 | 0.128814      |
| Smoking Index | CAD | rs7077678      | C | T | 0.623 | 0.012  | 0.002 | 2.40E-09 | 0.011614  | 0.009335<br>5 | 0.213473      |
| Smoking Index | CAD | rs7136754<br>5 | G | A | 0.791 | -0.015 | 0.002 | 1.70E-09 | 0.003924  | 0.012202<br>2 | 0.74777       |

|               |     |                |   |   |       |        |       |          |           |               |               |
|---------------|-----|----------------|---|---|-------|--------|-------|----------|-----------|---------------|---------------|
| Smoking Index | CAD | rs7144406      | A | G | 0.791 | -0.013 | 0.002 | 4.20E-08 | -0.003584 | 0.012996<br>2 | 0.782723      |
| Smoking Index | CAD | rs7155595      | A | C | 0.674 | -0.013 | 0.002 | 3.40E-09 | -0.008617 | 0.010265<br>3 | 0.40123       |
| Smoking Index | CAD | rs7267886<br>4 | G | A | 0.829 | 0.018  | 0.003 | 1.70E-11 | 0.010335  | 0.014001      | 0.460418      |
| Smoking Index | CAD | rs7297175      | T | C | 0.431 | -0.012 | 0.002 | 1.10E-08 | 0.004107  | 0.009830<br>8 | 0.676117      |
| Smoking Index | CAD | rs732083       | G | A | 0.333 | 0.012  | 0.002 | 1.40E-08 | 0.020676  | 0.009827<br>6 | 0.035389<br>1 |
| Smoking Index | CAD | rs7322054<br>4 | A | C | 0.842 | -0.016 | 0.003 | 1.50E-08 | -0.008214 | 0.013311<br>3 | 0.537188      |
| Smoking Index | CAD | rs7333559      | G | A | 0.212 | 0.015  | 0.002 | 5.30E-10 | 0.00524   | 0.012032<br>7 | 0.663214      |
| Smoking Index | CAD | rs7408691<br>1 | G | A | 0.925 | 0.021  | 0.004 | 2.00E-08 | 0.001896  | 0.018969<br>7 | 0.920385      |
| Smoking Index | CAD | rs7528604      | G | A | 0.566 | 0.014  | 0.002 | 6.60E-12 | 0.010029  | 0.009310<br>5 | 0.281403      |
| Smoking Index | CAD | rs7553348      | G | A | 0.438 | 0.014  | 0.002 | 5.90E-12 | -0.003328 | 0.00943       | 0.724151      |
| Smoking Index | CAD | rs7569203      | A | C | 0.689 | -0.016 | 0.002 | 5.50E-13 | 0.000949  | 0.009842<br>8 | 0.92319       |
| Smoking Index | CAD | rs7574240<br>6 | G | A | 0.739 | 0.014  | 0.002 | 1.20E-09 | 0.008049  | 0.010592<br>3 | 0.44732       |
| Smoking Index | CAD | rs7660858<br>2 | C | A | 0.953 | 0.031  | 0.005 | 3.40E-10 | -0.03298  | 0.037949<br>1 | 0.384815      |
| Smoking Index | CAD | rs7766610      | C | A | 0.183 | 0.018  | 0.003 | 2.40E-12 | 0.012158  | 0.010986<br>6 | 0.268458      |
| Smoking Index | CAD | rs7775552      | A | G | 0.513 | -0.012 | 0.002 | 2.50E-09 | -0.002453 | 0.009280<br>1 | 0.791526      |
| Smoking Index | CAD | rs7807019      | A | G | 0.54  | -0.015 | 0.002 | 7.50E-14 | -0.018949 | 0.009187<br>7 | 0.039167<br>9 |
| Smoking Index | CAD | rs8042134      | T | G | 0.541 | -0.014 | 0.002 | 2.20E-12 | 0.013937  | 0.009704<br>8 | 0.150976      |
| Smoking Index | CAD | rs8042849      | C | T | 0.342 | 0.028  | 0.002 | 2.40E-39 | -0.003889 | 0.010105<br>6 | 0.700359      |
| Smoking Index | CAD | rs860326       | C | T | 0.428 | 0.012  | 0.002 | 3.20E-09 | 0.007768  | 0.009569      | 0.416915      |



|               |     |           |   |   |       |        |       |          |           |               |                 |
|---------------|-----|-----------|---|---|-------|--------|-------|----------|-----------|---------------|-----------------|
| Smoking Index | CAD | rs8614    | C | A | 0.818 | -0.017 | 0.003 | 1.50E-10 | -0.021264 | 0.011673<br>1 | 0.068512<br>5   |
| Smoking Index | CAD | rs889398  | C | T | 0.588 | 0.013  | 0.002 | 3.90E-11 | 0.026764  | 0.009708<br>1 | 0.005835<br>53  |
| Smoking Index | CAD | rs912780  | T | G | 0.65  | 0.012  | 0.002 | 8.50E-09 | 0.004244  | 0.009540<br>8 | 0.656444        |
| Smoking Index | CAD | rs9435340 | T | A | 0.344 | 0.012  | 0.002 | 1.00E-08 | 0.011075  | 0.009727<br>6 | 0.254907        |
| Smoking Index | CAD | rs9842947 | C | T | 0.326 | -0.012 | 0.002 | 4.40E-09 | -0.000872 | 0.009900<br>3 | 0.929815        |
| Smoking Index | CAD | rs986391  | G | A | 0.367 | 0.016  | 0.002 | 1.30E-14 | -0.000997 | 0.009545<br>1 | 0.916811        |
| Smoking Index | CAD | rs9904288 | T | C | 0.708 | 0.012  | 0.002 | 2.40E-08 | 0.045469  | 0.010333<br>8 | 1.07999E-<br>05 |
| Smoking Index | CAD | rs9919670 | G | A | 0.612 | -0.022 | 0.002 | 2.10E-26 | 0.007256  | 0.009460<br>4 | 0.443089        |

**eTable 2. Egger Bias Intercept Test for Smoking Index-ASCVD Analysis**

| <b>Exposure</b>    | <b>Outcome</b> | <b>Egger Intercept</b> | <b>SE</b> | <b>P value</b> |
|--------------------|----------------|------------------------|-----------|----------------|
| Smoking Index      | PAD            | -0.0077                | 0.0052    | 0.14           |
| Smoking Index      | STROKE         | -0.0024                | 0.01      | 0.81           |
| Smoking Index      | CAD            | 0.01                   | 0.0052    | 0.046          |
| Smoking Initiation | PAD            | -0.002                 | 0.0077    | 0.79           |
| Smoking Initiation | STROKE         | -0.011                 | 0.012     | 0.35           |
| Smoking Initiation | CAD            | -0.0031                | 0.0068    | 0.65           |

The Egger bias intercept test was applied to detect evidence of horizontal pleiotropy in the association between smoking and ASCVD outcomes. The test was applied using both exposures for genetic liability to smoking (lifetime smoking index and smoking initiation). P-values < 0.05 were considered evidence of potential horizontal pleiotropy.

**eTable 3. MR Steiger Directionality Test for Smoking-Cardiometabolic Risk Factor Analysis**

| Exposure      | Outcome                | r <sup>2</sup> exposure | r <sup>2</sup> outcome | Correct causal direction | Steiger pvalue |
|---------------|------------------------|-------------------------|------------------------|--------------------------|----------------|
| Smoking Index | Type 2 diabetes        | 0.01                    | 0.0014                 | TRUE                     | 3.60E-49       |
| Smoking Index | Chronic kidney disease | 0.0089                  | 0.0012                 | TRUE                     | 4.70E-73       |
| Smoking Index | Overweight             | 0.0089                  | 0.0012                 | TRUE                     | 4.60E-90       |
| Smoking Index | Hypertension           | 0.012                   | 0.0017                 | TRUE                     | 2.70E-236      |
| Smoking Index | Hyperlipidemia         | 0.011                   | 0.0016                 | TRUE                     | 3.40E-224      |
| Smoking Index | eGFR (creatinine)      | 0.0088                  | 0.001                  | TRUE                     | 1.70E-88       |
| Smoking Index | Body mass index        | 0.009                   | 0.0023                 | TRUE                     | 1.20E-79       |
| Smoking Index | HDL cholesterol        | 0.0089                  | 0.0013                 | TRUE                     | 3.00E-63       |
| Smoking Index | LDL cholesterol        | 0.0089                  | 0.001                  | TRUE                     | 1.20E-70       |
| Smoking Index | Total cholesterol      | 0.0089                  | 0.0012                 | TRUE                     | 1.90E-68       |
| Smoking Index | Triglycerides          | 0.0089                  | 0.0014                 | TRUE                     | 4.50E-59       |
| Smoking Index | Waist circumference    | 0.009                   | 0.0026                 | TRUE                     | 5.80E-52       |
| Smoking Index | Waist-to-hip ratio     | 0.009                   | 0.0016                 | TRUE                     | 2.70E-75       |
| Smoking Index | HbA1C                  | 0.0089                  | 0.0019                 | TRUE                     | 6.60E-25       |
| Smoking Index | Fasting glucose        | 0.0091                  | 0.002                  | TRUE                     | 3.60E-31       |
| Smoking Index | Fasting insulin        | 0.0091                  | 0.0023                 | TRUE                     | 3.40E-25       |
| Smoking Index | Interleukin-1 beta     | 0.012                   | 0.046                  | FALSE                    | 6.00E-10       |
| Smoking Index | Interleukin-6          | 0.012                   | 0.035                  | FALSE                    | 0.0000045      |
| Smoking Index | C-reactive protein     | 0.012                   | 0.037                  | FALSE                    | 0.0000014      |

|               |                         |        |        |       |           |
|---------------|-------------------------|--------|--------|-------|-----------|
| Smoking Index | Interleukin-6 receptor  | 0.0097 | 0.034  | FALSE | 3.60E-07  |
| Smoking Index | Systolic Blood Pressure | 0.012  | 0.0015 | TRUE  | 3.10E-248 |

The MR Steiger directionality test was applied to determine the correct direction of effect for the estimated associations between smoking and cardiometabolic risk factors for ASCV.
